# Supplementary material for: The evolution of a super-swarm of foot-and-mouth disease virus in cattle
Source: PLoS One. 2019 Apr 25;14(4):e0210847. doi: 10.1371/journal.pone.0210847 (PMC6483180; doi:10.1371/journal.pone.0210847)
Supplement: S1 Fig — (PDF) [file pone.0210847.s001.pdf]

**Supplementary Figure 1.** Alignment of 52 consensus virus sequences† with inoculum consensus as reference

[illegible]

\* Underlined amino acid changes are those residues with substitutions at two codon sites

† Abbreviations: DPI – days post-infection, Na – nasal secretion, Np – nasopharyngeal tissue (necropsy), OPF – oropharyngeal fluid (probang cup sample), Sa – saliva, Se – serum, Ves – epithelial vesicle
